# Supplementary material for: Lactobacillus plantarum LMT1-48 exerts anti-obesity effect in high-fat diet-induced obese mice by regulating expression of lipogenic genes
Source: PubMed Central journal article supplement (PMC6972779; doi:10.1038/s41598-020-57615-5), 2020-01-21
Supplement: 41598_2020_57615_MOESM1_ESM.pdf [file 41598_2020_57615_MOESM1_ESM.pdf]

1 ***Lactobacillus plantarum* LMT1-48 exerts anti-obesity effect in high-fat diet-induced**  
2 **obese mice by regulating expression of lipogenic genes**

3

4

5

6 Woo Jin Choi, Hye Jin Dong, Hyun Uk Jeong, Dong Wook Ryu, Soo Min Song, Yu Ri Kim,  
7 Hyun Ho Jung, Tai Hoon Kim,\* and Yeung-Hyen Kim\*

8

9 Medytox Gwangkyo R&D center, Medytox Inc., Suwon, Republic of Korea.

10

11 Running title: Anti-obesity effect of *Lactobacillus plantarum* LMT1-48

12

13

14 \*Y. -H. K. and T. H. K. are joint senior authors.

15

16 Corresponding author:

17 Address for correspondence and reprint requests: Yeung-Hyen Kim, Ph.D., Medytox

18 Gwangkyo R&D center, Medytox Inc., 114 Central town-ro, Yeongtong-gu, Suwon-si,

19 Gyeonggi-do, 16506, Republic of Korea.

20 Phone: +82 31 8065 8104; Fax: +82 31 8065 8232, E-mail: yhkim@medytox.com or

21 yhkim61@gmail.com

22

23

24 **Supplementary figure legend**

25

26 **Supplementary Fig. S1. The effect of the *L. plantarum* LMT1-48 extract on the viability**  
27 **of 3T3-L1 adipocytes**

28 (A) The viability of 3T3-L1 cells under various concentrations of the *L. plantarum* LMT1-48  
29 extract (0, 25, 50, 100, 200, 400, or 800 µg/ml) was evaluated. (B) The *L. plantarum* LMT1-  
30 48 extract (200 µg/ml) was administered to 3T3-L1 cells alone or in combination with MDI  
31 reagent to assess the viability of 3T3-L1 cells undergoing adipogenic differentiation. The  
32 absorbance was measured at 450 nm using an ELISA reader. Two independent experiments were  
33 performed with n = 5 for each experiment. Error bars represent standard error of the mean  
34 (Mean ± SEM). \*\*\*\* $P < .0001$ .

35

36

37

38

39

40

41

42

43

44

45

46

47

48 Supplementary Fig. S1

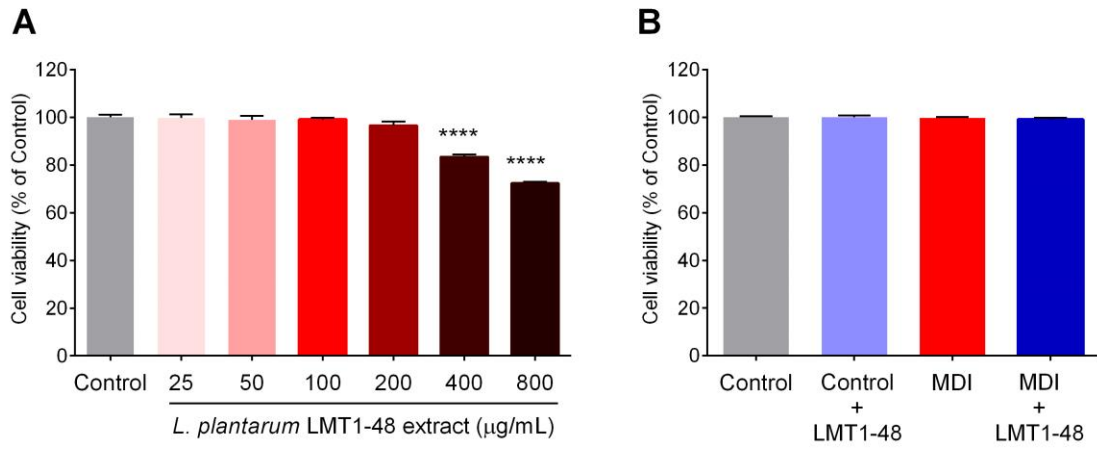

49
